# Supplementary material for: Premature mortality trends in 183 countries by cancer type, sex, WHO region, and World Bank income level in 2000–19: a retrospective, cross-sectional, population-based study
Source: PubMed Central journal article supplement (PMC11329430; doi:10.1016/s1470-2045(24)00274-2), 2024-08
Supplement: mmc1.pdf [file mmc1.pdf]

# THE LANCET Oncology

## Supplementary appendix

This appendix formed part of the original submission and has been peer reviewed. We post it as supplied by the authors.

Supplement to: Murthy SS, Trapani D, Cao B, et al. Premature mortality trends in 183 countries by cancer type, sex, WHO region, and World Bank income level in 2000–19: a retrospective, cross-sectional, population-based study. *Lancet Oncol* 2024; published online July 1. [https://doi.org/10.1016/S1470-2045\(24\)00274-2](https://doi.org/10.1016/S1470-2045(24)00274-2).

# Appendix

## Supplement 1: Countries By World Bank Classification

Our World Bank (WB) definitions have been taken based on the 2019-2020 classifications. Which at that time WB classified low-income countries with gross national income (GNI) per capita of \$1035 or less; low middle-income economies have GNI per capita between \$1036 and \$4045 in 2019; Upper Middle-Income economies GNI per capita between \$4,046 and \$12,535; High-Income Economics are those with GNI per capita of \$12,536 or more. (Based on 2019-2020 WB definitions)

We had a total of 183 countries were analysed: 54 high-income countries (HIC), 51 upper middle-income countries (UMIC), 49 low middle-income countries (LMIC), and 29 low-income countries (LIC). There were 47 countries in the African region (AFRO), 33 in Americas region (AMRO), 50 in Europe (EURO), 21 in Eastern Mediterranean region (EMRO), 21 in Western Pacific region (WPRO), and 11 countries in South-East Asia (SEARO)

<https://datahelpdesk.worldbank.org/knowledgebase/articles/906519-world-bank-country-and-lending-groups>

**High Income Countries (54 countries):** United Arab Emirates, Antigua and Barbuda, Australia, Austria, Belgium, Bahrain, Bahamas, Barbados, Brunei Darussalam, Canada, Switzerland, Chile, Cyprus, Czechia, Germany, Denmark, Spain, Estonia, Finland, France, United Kingdom, Greece, Croatia, Hungary, Ireland, Iceland, Israel, Italy, Japan, Republic of Korea, Kuwait, Lithuania, Luxembourg, Latvia, Malta, Mauritius, Netherlands, Norway, New Zealand, Oman, Panama, Poland, Portugal, Qatar, Romania, Saudi Arabia, Singapore, Slovakia, Slovenia, Sweden, Seychelles, Trinidad and Tobago, Uruguay, United States of America

**Upper Middle-Income Countries (51 countries):** Albania, Argentina, Armenia, Azerbaijan, Bulgaria, Bosnia and Herzegovina, Belarus, Belize, Brazil, Botswana, China, Colombia, Costa Rica, Cuba, Dominican Republic, Ecuador, Fiji, Gabon, Georgia, Equatorial Guinea, Grenada, Guatemala, Guyana, Indonesia, Iran (Islamic Republic of), Iraq, Jamaica, Jordan, Kazakhstan, Lebanon, Libya, Saint Lucia, Maldives, Mexico, North Macedonia, Montenegro, Malaysia, Namibia, Peru, Paraguay, Russian Federation, Serbia, Suriname, Thailand, Turkmenistan, Tonga, Turkey, Saint Vincent and the Grenadines, Venezuela (Bolivarian Republic of), Samoa, South Africa

**Low- and Middle-Income Countries(49 countries):** Angola, Benin, Bangladesh, Bolivia (Plurinational State of), Bhutan, Cote d'Ivoire, Cameroon, Congo, Comoros, Cabo Verde, Djibouti, Algeria, Egypt, Micronesia (Federated States of), Ghana, Honduras, India, Kenya, Kyrgyzstan, Cambodia, Kiribati, Lao People's Democratic Republic, Sri Lanka, Lesotho, Morocco, Republic of Moldova, Myanmar, Mongolia, Mauritania, Nigeria, Nicaragua, Nepal, Pakistan, Philippines, Papua New Guinea, Senegal, Solomon Islands, El Salvador, Sao Tome and Principe, Eswatini, Timor-Leste, Tunisia, United Republic of Tanzania, Ukraine, Uzbekistan, Vietnam, Vanuatu, Zambia, Zimbabwe

**Low Income Countries (29 countries):** Afghanistan, Burundi, Burkina Faso, Central African Republic, Democratic Republic of the Congo, Eritrea, Ethiopia, Guinea, Gambia, Guinea-Bissau, Haiti, Liberia, Madagascar, Mali, Mozambique, Malawi, Niger, Democratic People's Republic of Korea, Rwanda, Sudan, Sierra Leone, Somalia, South Sudan, Syrian Arab Republic, Chad, Togo, Tajikistan, Uganda, Yemen

## WHO Regions

| <b>African Region (AFRO)</b>     | <b>Region of the Americas (AMRO)</b> | <b>European Region (EURO)</b> | <b>Eastern Mediterranean Region (EMRO)</b> | <b>Western Pacific Region (WPRO)</b> | <b>South-East Asia Region (SEARO)</b> |
|----------------------------------|--------------------------------------|-------------------------------|--------------------------------------------|--------------------------------------|---------------------------------------|
| Angola                           | Argentina                            | Albania                       | Afghanistan                                | Australia                            | Bangladesh                            |
| Burundi                          | Antigua and Barbuda                  | Armenia                       | United Arab Emirates                       | Brunei Darussalam                    | Bhutan                                |
| Benin                            | Bahamas                              | Austria                       | Bahrain                                    | China                                | Indonesia                             |
| Burkina Faso                     | Belize                               | Azerbaijan                    | Djibouti                                   | Fiji                                 | India                                 |
| Botswana                         | Bolivia                              | Belgium                       | Egypt                                      | Micronesia, Federated States of      | Sri Lanka                             |
| Central African Republic         | Brazil                               | Bulgaria                      | Iran, Islamic Republic of                  | Japan                                | Maldives                              |
| Cote d'Ivoire                    | Barbados                             | Bosnia and Herzegovina        | Iraq                                       | Cambodia                             | Myanmar                               |
| Cameroon                         | Canada                               | Belarus                       | Jordan                                     | Kiribati                             | Nepal                                 |
| Democratic Republic of the Congo | Chile                                | Switzerland                   | Kuwait                                     | Korea, Republic of                   | Democratic People's Republic of Korea |
| Comoros                          | Colombia                             | Cyprus                        | Lebanon                                    | Lao People's Democratic Republic     | Thailand                              |
| Cabo Verde                       | Costa Rica                           | Czech Republic                | Libya                                      | Mongolia                             | Timor-Leste                           |
| Algeria                          | Cuba                                 | Germany                       | Morocco                                    | Malaysia                             |                                       |
| Eritrea                          | Dominican Republic                   | Denmark                       | Oman                                       | New Zealand                          |                                       |
| Ethiopia                         | Ecuador                              | Spain                         | Pakistan                                   | Philippines                          |                                       |
| Gabon                            | Grenada                              | Estonia                       | Qatar                                      | Papua New Guinea                     |                                       |
| Ghana                            | Guatemala                            | Finland                       | Saudi Arabia                               | Singapore                            |                                       |
| Gambia                           | Guyana                               | France                        | Sudan                                      | Solomon Islands                      |                                       |
| Guinea-Bissau                    | Honduras                             | United Kingdom                | Somalia                                    | Viet Nam                             |                                       |
| Equatorial Guinea                | Haiti                                | Georgia                       | Syrian Arab Republic                       | Vanuatu                              |                                       |
| Kenya                            | Jamaica                              | Greece                        | Tunisia                                    | Samoa                                |                                       |
| Liberia                          | Saint Lucia                          | Croatia                       | Yemen                                      |                                      |                                       |
| Lesotho                          | Mexico                               | Hungary                       |                                            |                                      |                                       |
| Madagascar                       | Nicaragua                            | Ireland                       |                                            |                                      |                                       |
| Mali                             | Panama                               | Iceland                       |                                            |                                      |                                       |
| Mozambique                       | Peru                                 | Israel                        |                                            |                                      |                                       |
| Mauritania                       | Paraguay                             | Italy                         |                                            |                                      |                                       |
| Mauritius                        | El Salvador                          | Kazakhstan                    |                                            |                                      |                                       |
| Malawi                           | Suriname                             | Kyrgyzstan                    |                                            |                                      |                                       |
| Namibia                          | Trinidad and Tobago                  | Lithuania                     |                                            |                                      |                                       |
| Niger                            | Uruguay                              | Luxembourg                    |                                            |                                      |                                       |
| Nigeria                          | United States of America             | Latvia                        |                                            |                                      |                                       |
| Rwanda                           | Saint Vincent and the Grenadine      | Moldova, Republic of          |                                            |                                      |                                       |

|                              |           |                    |  |  |  |
|------------------------------|-----------|--------------------|--|--|--|
| Senegal                      | Venezuela | North Macedonia    |  |  |  |
| Sierra Leone                 |           | Malta              |  |  |  |
| South Sudan                  |           | Montenegro         |  |  |  |
| Sao Tome and Principe        |           | Netherlands        |  |  |  |
| Eswatini                     |           | Norway             |  |  |  |
| Seychelles                   |           | Poland             |  |  |  |
| Chad                         |           | Portugal           |  |  |  |
| Togo                         |           | Romania            |  |  |  |
| Tonga                        |           | Russian Federation |  |  |  |
| Tanzania, United Republic of |           | Serbia             |  |  |  |
| Uganda                       |           | Slovakia           |  |  |  |
| South Africa                 |           | Slovenia           |  |  |  |
| Zambia                       |           | Sweden             |  |  |  |
| Zimbabwe                     |           | Tajikistan         |  |  |  |
|                              |           | Turkmenistan       |  |  |  |
|                              |           | Turkey             |  |  |  |
|                              |           | Ukraine            |  |  |  |
|                              |           | Uzbekistan         |  |  |  |

### **Cancer Classification ICD-10 codes**

Cancers that are included in our data set are classified according to the International Classification of Disease version 10. We ranked and included cancers according to the estimated incident number of cases reported by the International Agency for Research on Cancer, Global Cancer Observatory data from 2020 available on their website below.

| <b>International Classification Disease (ICD)</b> |                                                                                 | <b>Categories and Abbreviations Utilized in Study</b> |
|---------------------------------------------------|---------------------------------------------------------------------------------|-------------------------------------------------------|
| C00-97                                            | All cancers                                                                     | All cancers (All)                                     |
| C50                                               | Breast                                                                          | Breast                                                |
| C33-34                                            | Lung, Trachea, Bronchus                                                         | Lung                                                  |
| C18-21                                            | Colon, Rectum, Anus                                                             | Colorectal (CRC)                                      |
| C61                                               | Prostate                                                                        | Prostate                                              |
| C16                                               | Stomach                                                                         | Stomach                                               |
| C22                                               | Liver and intrahepatic bile ducts                                               | Liver                                                 |
| C53                                               | Cervix Uteri                                                                    | Cervical                                              |
| C73                                               | Thyroid                                                                         | Thyroid                                               |
| C15                                               | Oesophagus                                                                      | Esophagus                                             |
| C82-86, C96                                       | Non-Hodgkin lymphoma                                                            | Non-Hodgkin lymphoma (NHL)                            |
| C54                                               | Corpus uteri                                                                    | Uterine                                               |
| C67                                               | Bladder                                                                         | Bladder                                               |
| C00-C13, C32                                      | Hypopharynx, Oropharynx, Lip, Oral cavity, Salivary glands, Nasopharynx, Larynx | Head and Neck (H&N)                                   |
| C64-65                                            | Kidney and renal pelvis                                                         | Kidney                                                |
| C25                                               | Pancreas                                                                        | Pancreas                                              |
| C56                                               | Ovary                                                                           | Ovarian                                               |
| C91-95                                            | Leukemia                                                                        | Leukemia                                              |

[https://gco.iarc.fr/today/online-analysis-table?v=2018&mode=cancer&mode\\_population=continents&population=900&populations=900&key=asr&sex=0&cancer=39&type=0&statistic=5&prevalence=0&population\\_group=0&ages\\_group%5B%5D=6&ages\\_group%5B%5D=13&group\\_cancer=1&include\\_nmsc=1&include\\_nmsc\\_other=1](https://gco.iarc.fr/today/online-analysis-table?v=2018&mode=cancer&mode_population=continents&population=900&populations=900&key=asr&sex=0&cancer=39&type=0&statistic=5&prevalence=0&population_group=0&ages_group%5B%5D=6&ages_group%5B%5D=13&group_cancer=1&include_nmsc=1&include_nmsc_other=1)

## **Premature Mortality Calculations**

Premature mortality has been chosen as a global standard health indicator because it minimizes confounding across countries, it controls for differences in population age structure, and it is independent of other competing causes of mortality. The lower age of 30 years was chosen because that is an age when mortality risk for four chronic diseases starts to rise in most countries. Seventy years of age was chosen as the upper limit of age because at older ages deaths were mostly coded as ill-defined causes and people have other confounding comorbidities that could affect the assignment of cause of death. Furthermore, for this age range 30-70 years, in almost all regions of the world, the majority of deaths can be attributed to the four chronic disease groups (cancer, cardiovascular disease, diabetes, and chronic respiratory disease).<sup>1-2</sup> We focused solely on cancer and calculated overall premature mortality for all cancers and 13 different types of cancers. Premature mortality is the unconditional probability of dying between ages 30 and 70 years from a specific cause. It is calculated utilizing life table methods by 5-year age groups and mortality rates from a specific cause of death.<sup>1-3</sup>

## **Premature Mortality Estimate 2030**

For the secondary analysis to benchmark the historical trends with the SDG target, the percentage reduction can be assumed constant for all age-groups and all causes addressed by the NCD target. To achieve the target, we reduced mortality rates from each individual type of cancers and other three major NCDs at the same rate for all 5-year age groups from age 30 to 70 years.

## **Average Annual Rate of Change in Premature mortality Logarithmic Formula**

This formula is conventionally used for health-related SDG indicator monitoring in the World Health Statistics report as below.<sup>2</sup>

$$R=(\ln(pm_{t2})-\ln(pm_{t1}))/t2-t1)$$

pm=premature mortality

t=year

### **Categorization Targets to Reach SDG 3.4 Target**

|   |                 |           |
|---|-----------------|-----------|
| 1 | <0              | Very Low  |
| 2 | $\geq 0-0.84$   | Low       |
| 3 | $\geq 0.85-1.1$ | High      |
| 4 | >1.2            | Very High |

## **References**

1. World Health Organization. Global Health Observatory, premature mortality from non-communicable disease.[online]. [Accessed 29 June 2023]. Available from: <https://www.who.int/data/gho/indicator-metadata-registry/imr-details/3411>
2. World Health Organization. WHO methods and data sources for country-level causes of death 2000-2019. Department of Data and Analytics (DNA). Division of Data, Analytics and Delivery for Impact. [online].WHO Geneva December 2020 [Accessed 29 June 2023]. Available from [https://www.who.int/docs/default-source/gho-documents/global-health-estimates/ghe2019\\_cod\\_methods.pdf?sfvrsn=37befacc\\_5](https://www.who.int/docs/default-source/gho-documents/global-health-estimates/ghe2019_cod_methods.pdf?sfvrsn=37befacc_5)
3. World Health Organization. (2014). Global status report on non-communicable diseases. [online]. 2014 [Accessed 29 June 2023] Available from: <https://apps.who.int/iris/handle/10665/148114>

## Figures by Sex, World Bank Income Level, and WHO Region

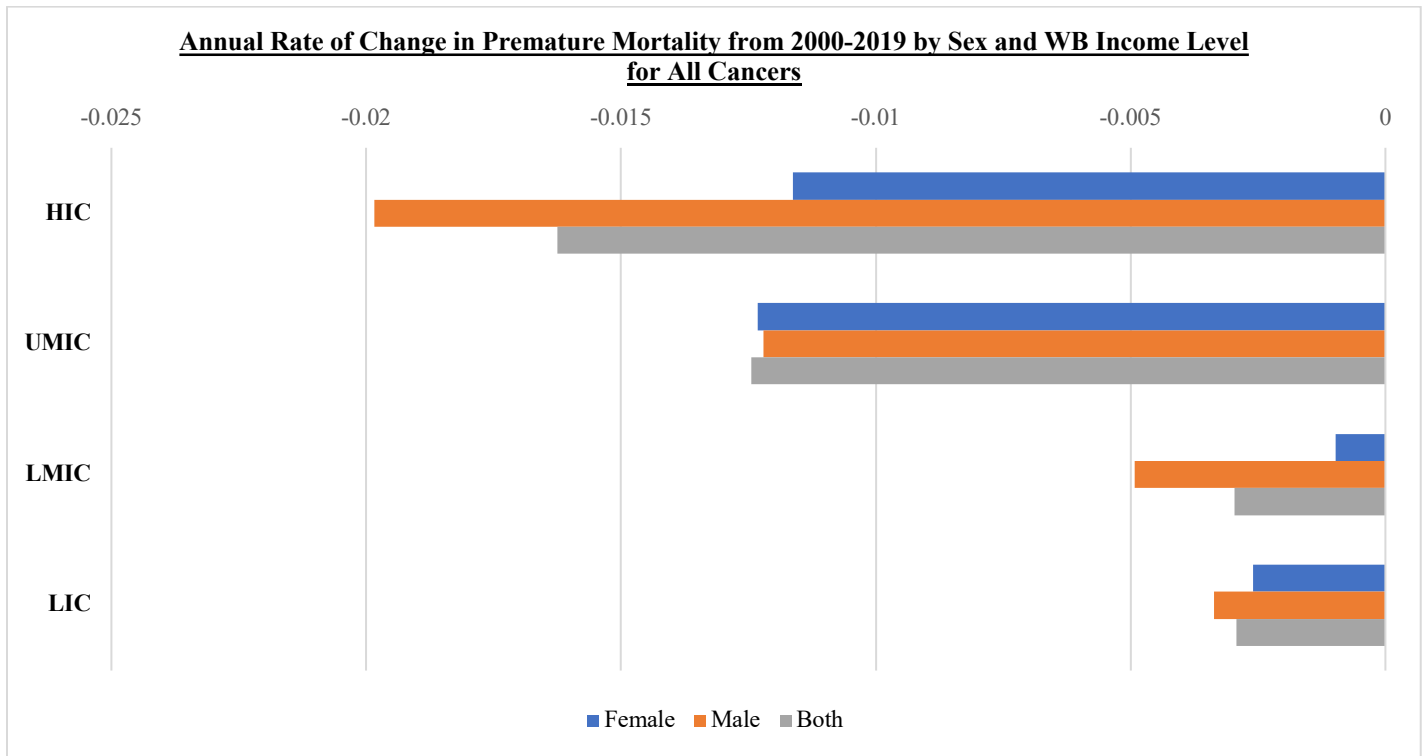

Figure 4 Trends in the annual rate of change in premature mortality from 2000-2019 for all cancers by sex and world bank income level

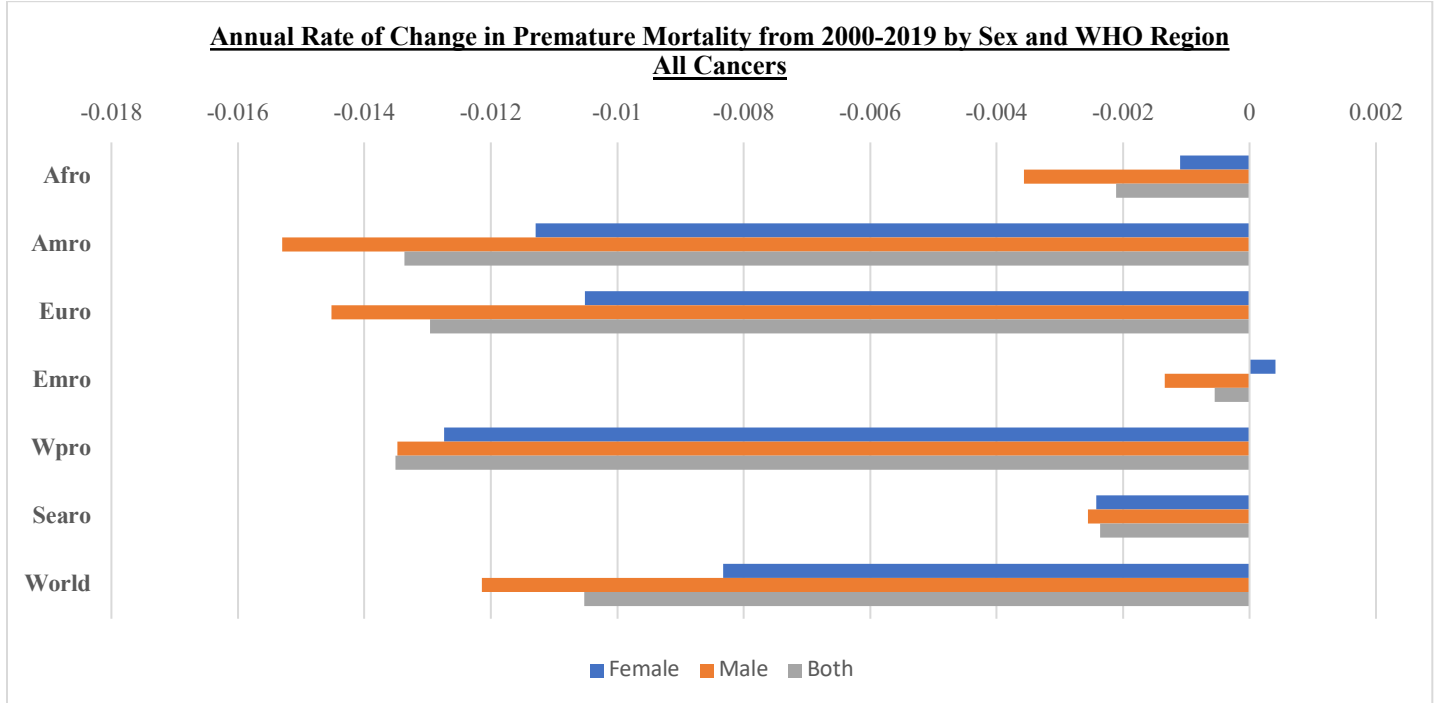

Figure 5: Trends in the annual rate of change in premature mortality from 2000-2019 for all cancers by sex and world health organization region

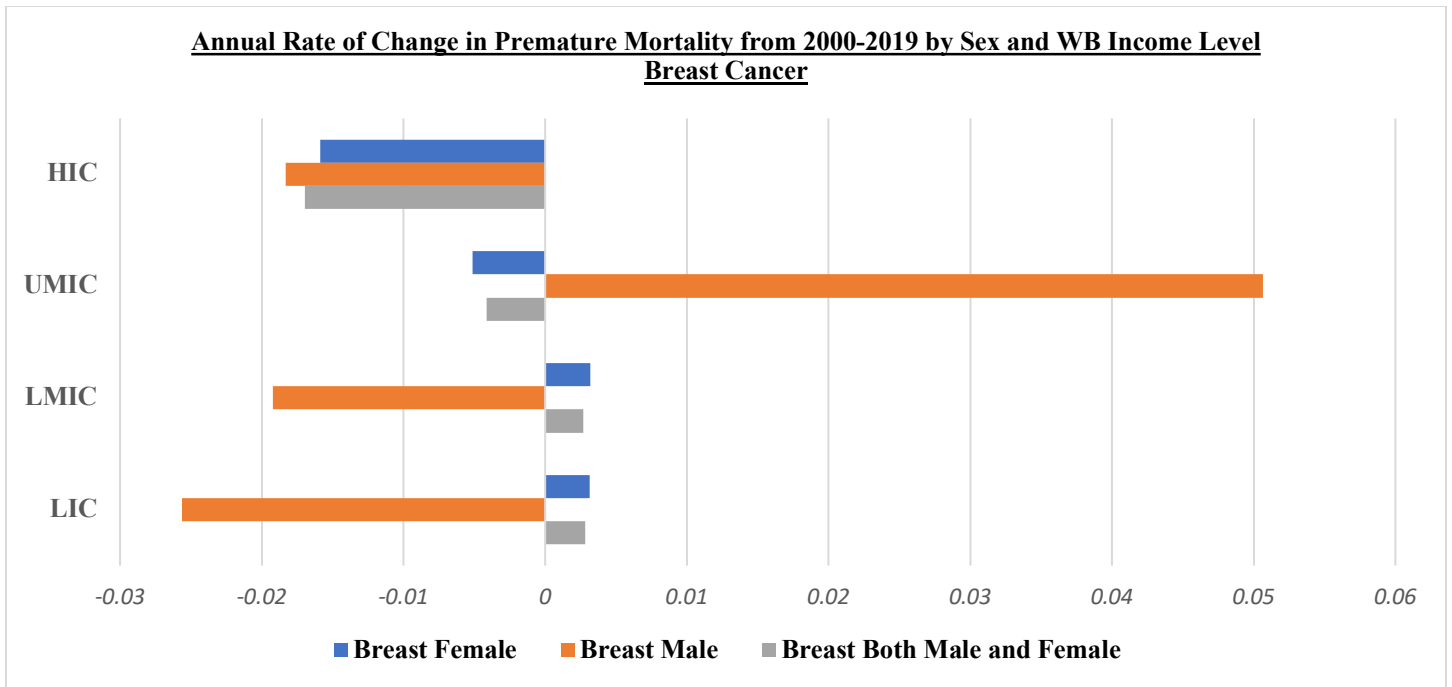

Figure 6: Trends in the annual rate of change in premature mortality from 2000-2019 for breast cancer by sex and world bank income level

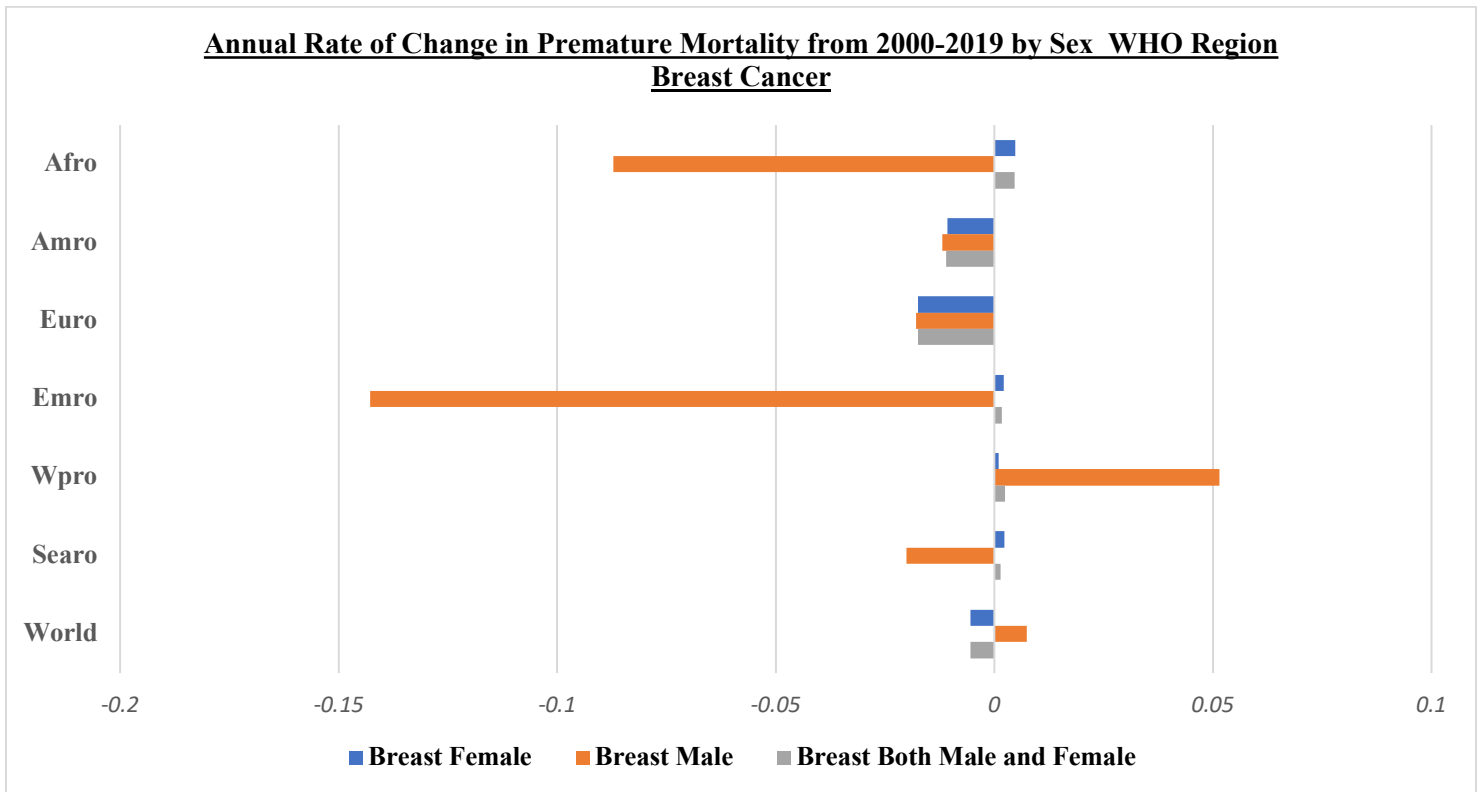

Figure 7: Trends in the annual rate of change in premature mortality from 2000-2019 for breast cancer by sex and world health organization region

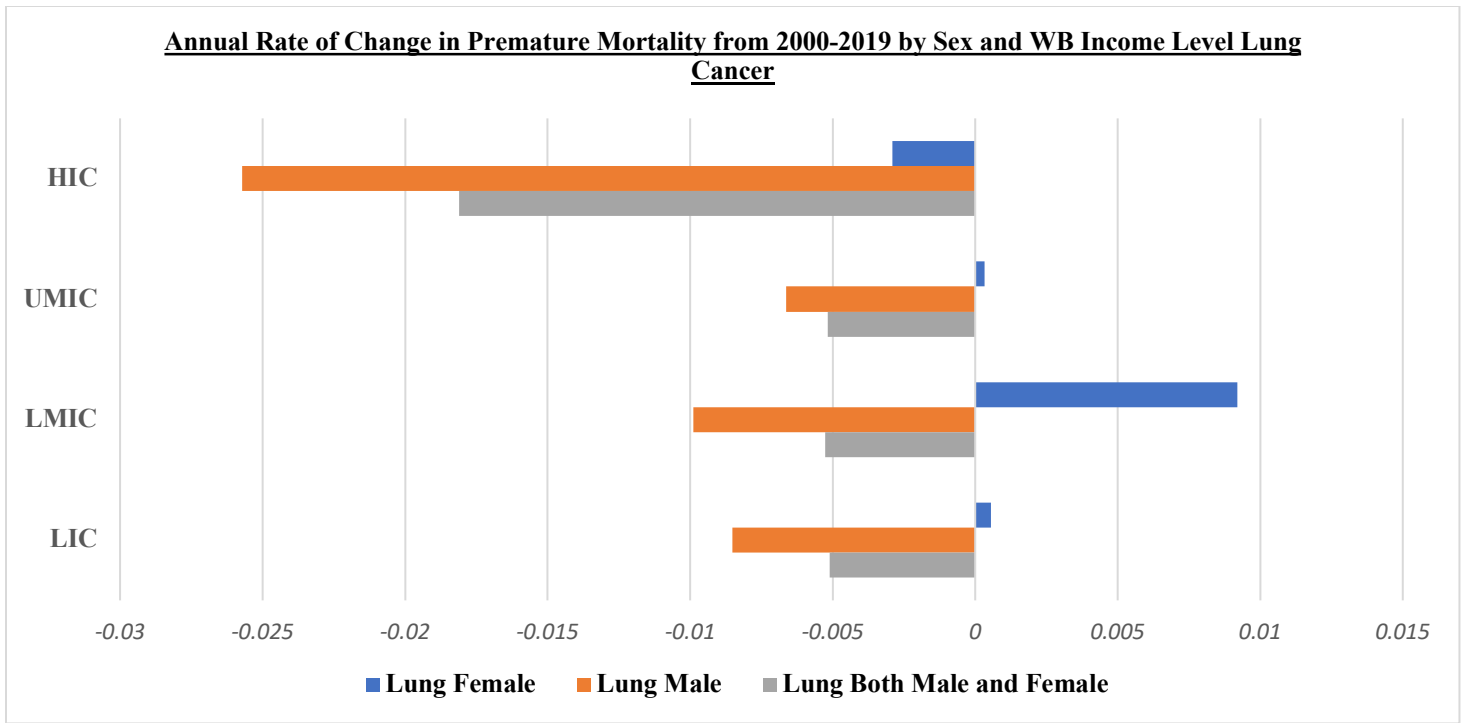

Figure 8: Trends in the annual rate of change in premature mortality from 2000-2019 for lung cancer by sex and world bank income level

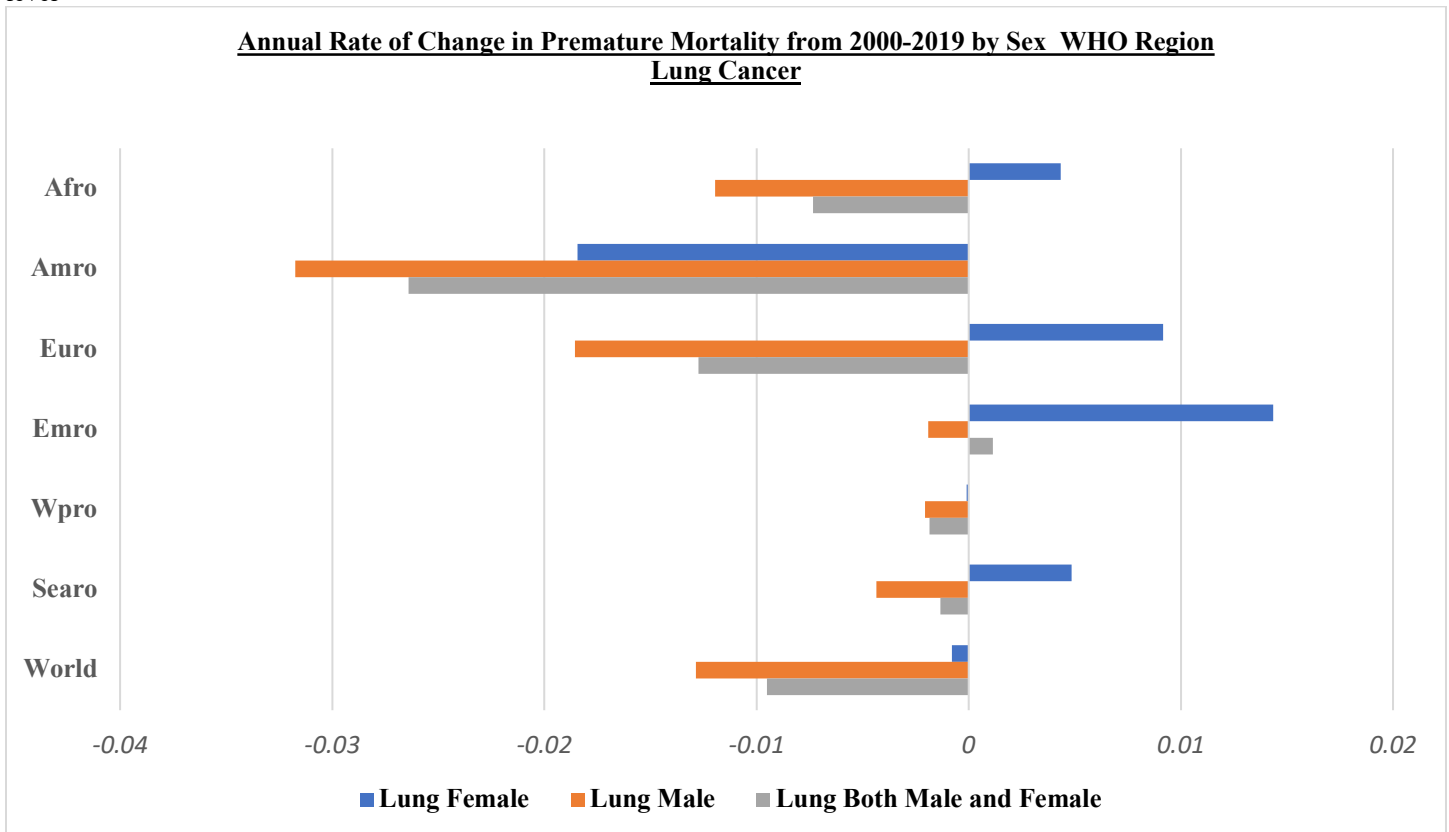

Figure 9: Trends in the annual rate of change in premature mortality from 2000-2019 for lung cancer by sex and world health organization region



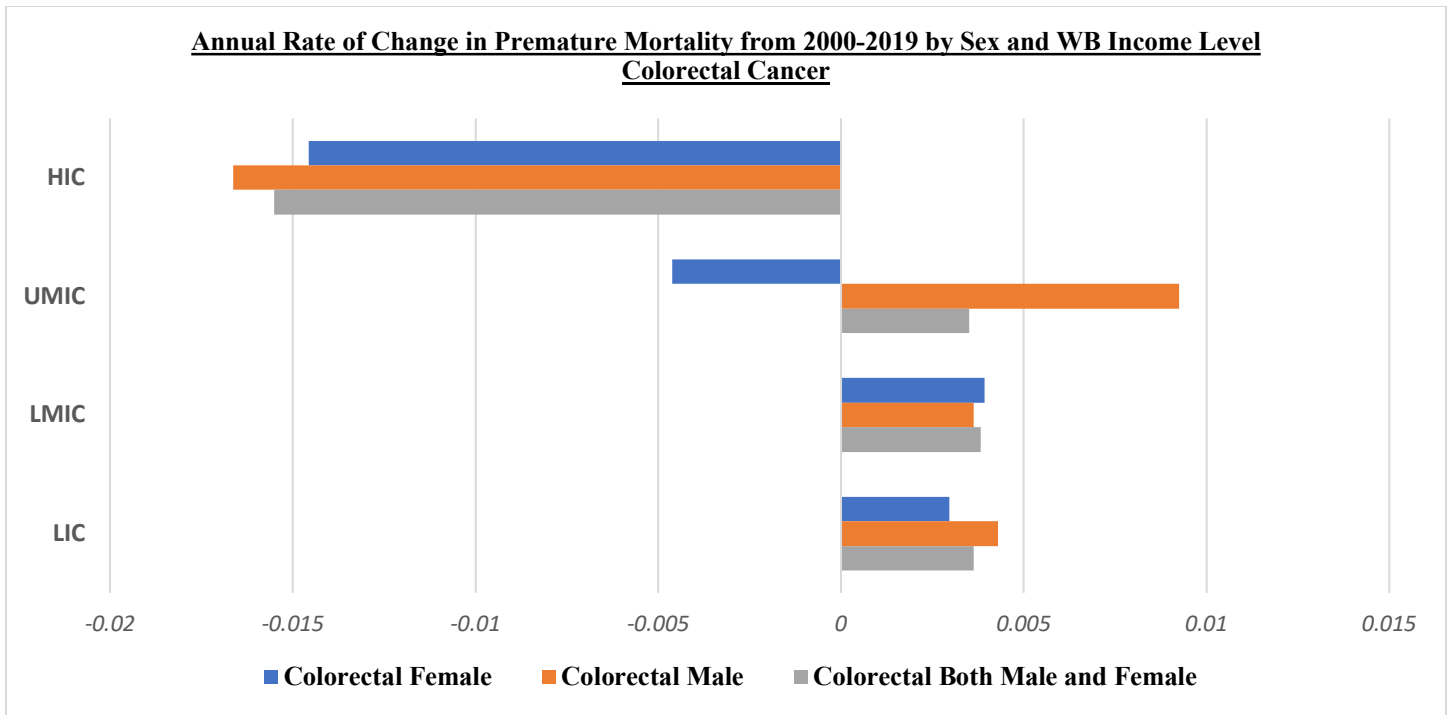

Figure 10: Trends in the annual rate of change in premature mortality from 2000-2019 for colorectal cancer by sex and world bank income level

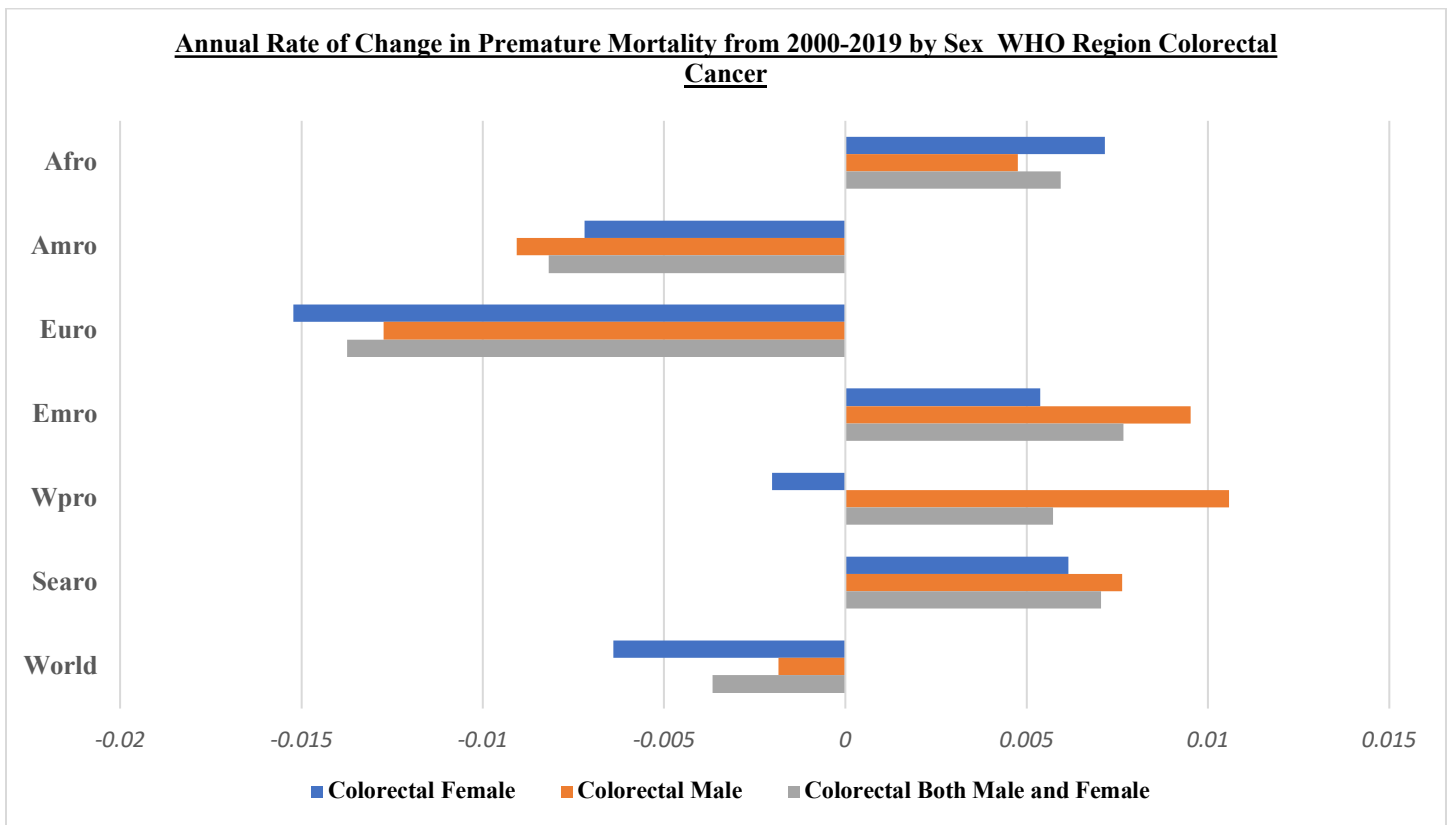

Figure 11: Trends in the annual rate of change in premature mortality from 2000-2019 for colorectal cancer by sex and world health organization region

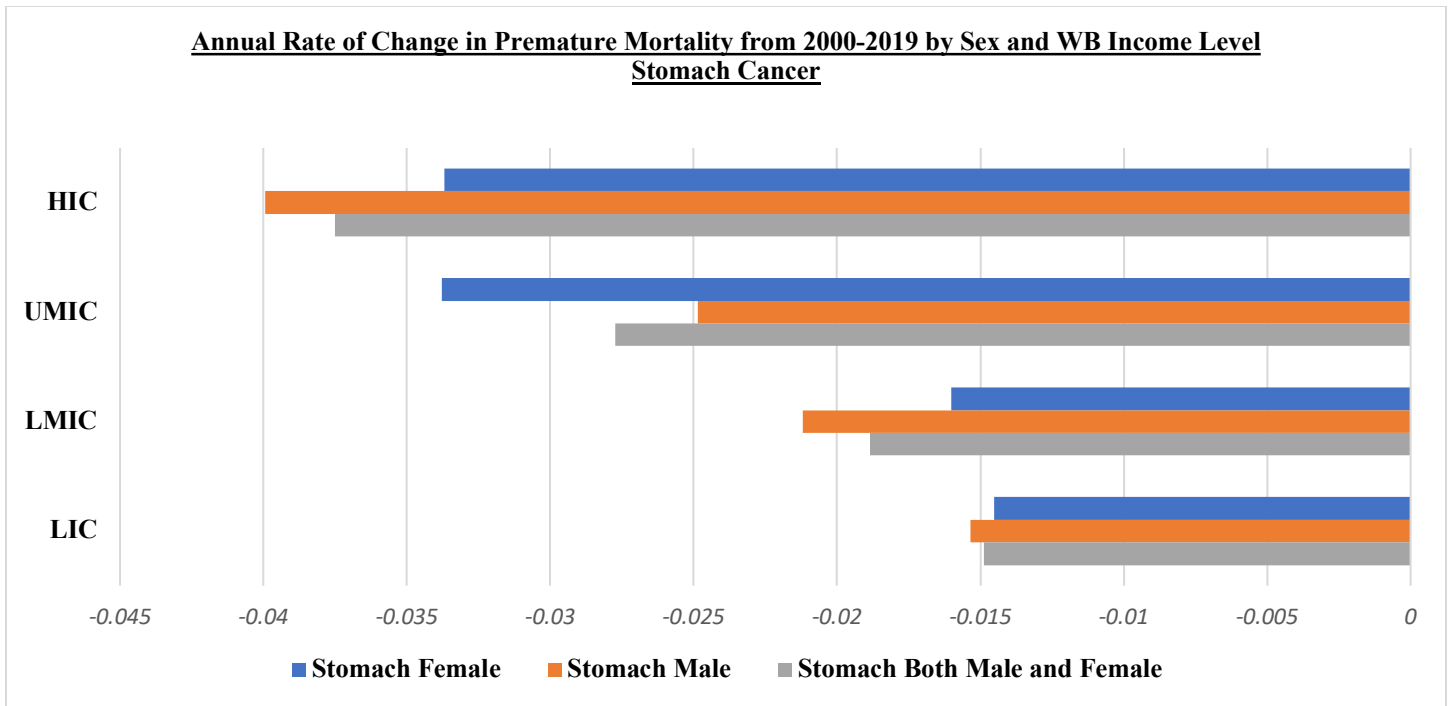

Figure 12: Trends in the annual rate of change in premature mortality from 2000-2019 for stomach cancer by sex and world health organization region

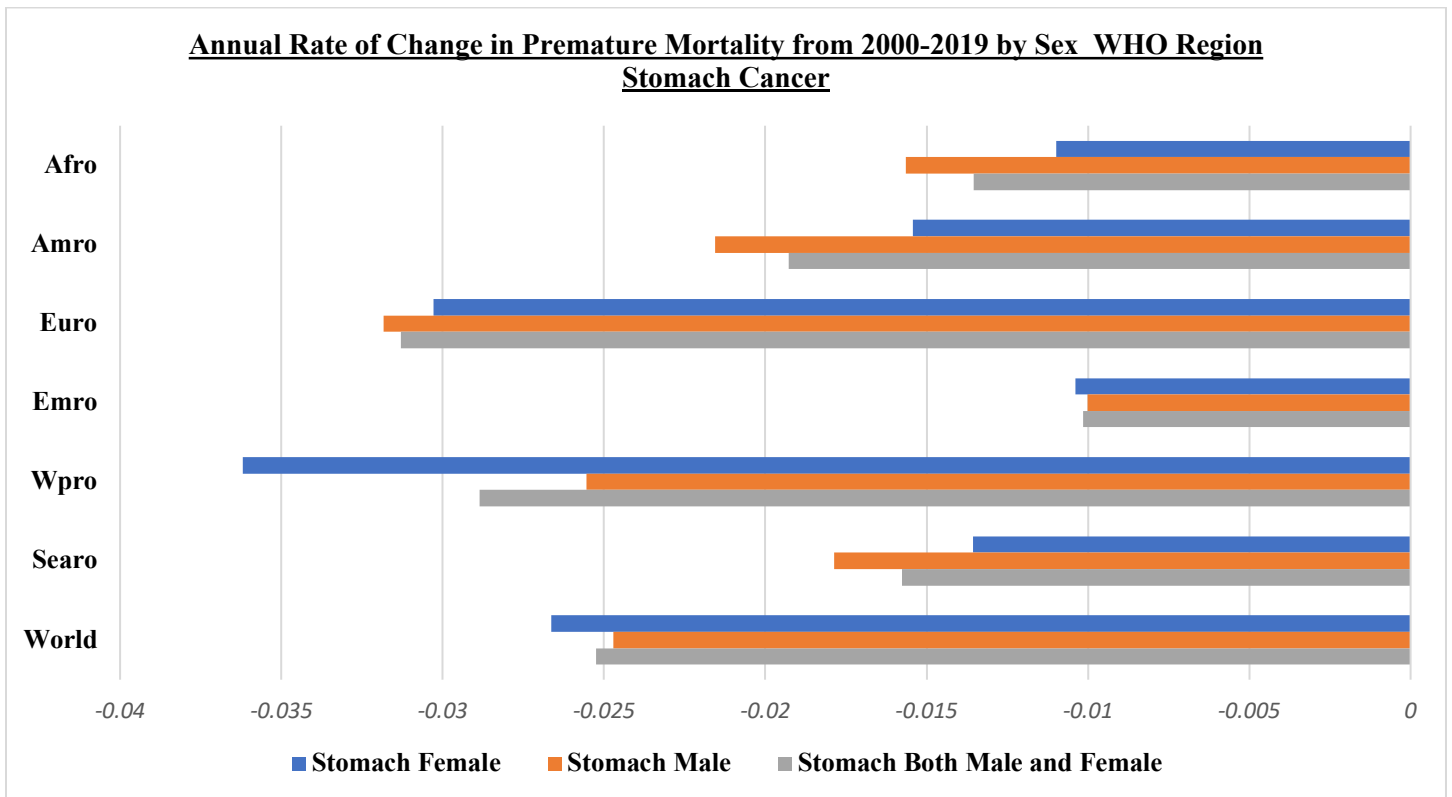

Figure 13: Trends in the annual rate of change in premature mortality from 2000-2019 for stomach cancer by sex and world health organization region

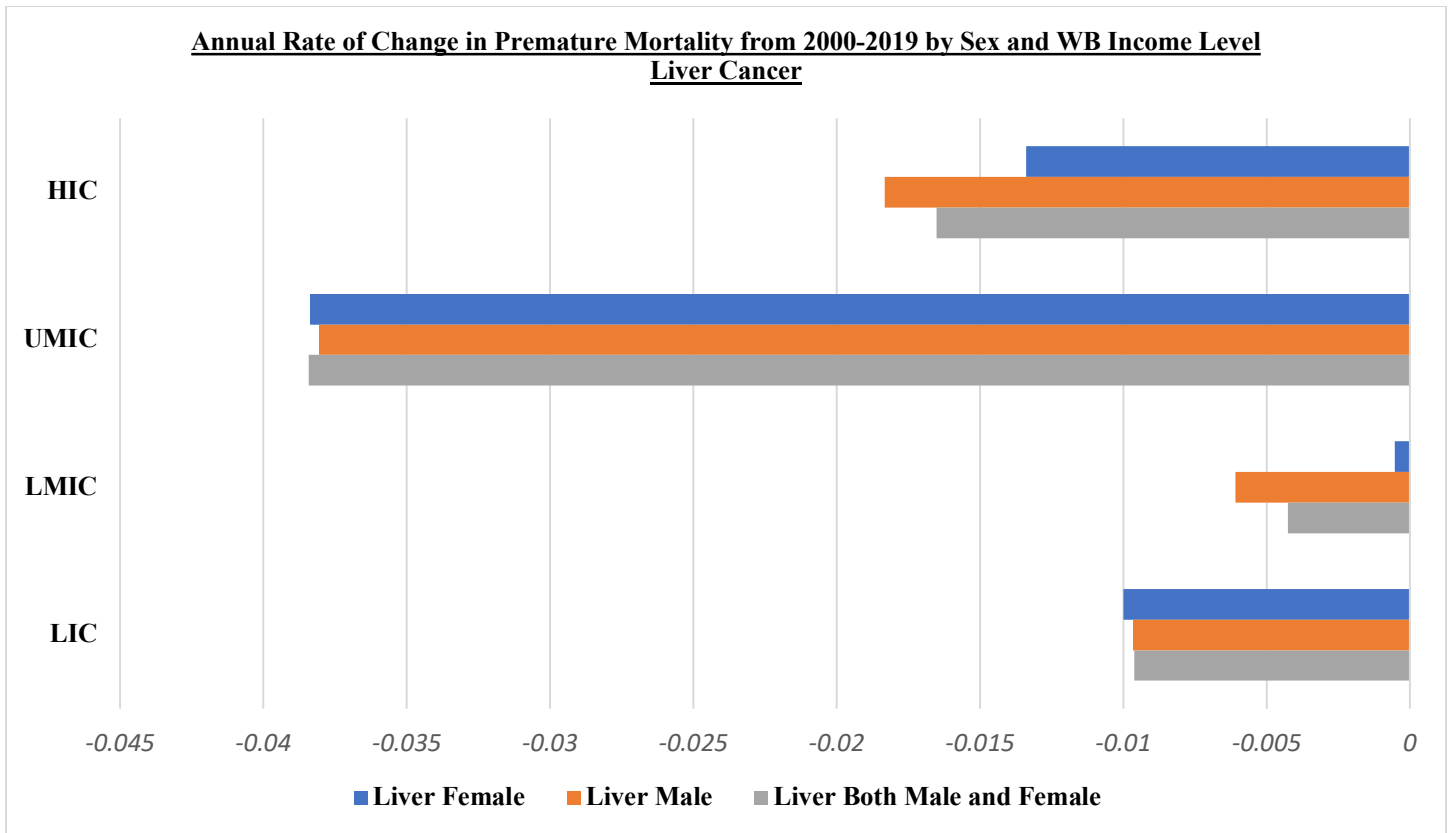

Figure 14: Trends in the annual rate of change in premature mortality from 2000-2019 for liver cancer by sex and world bank income level

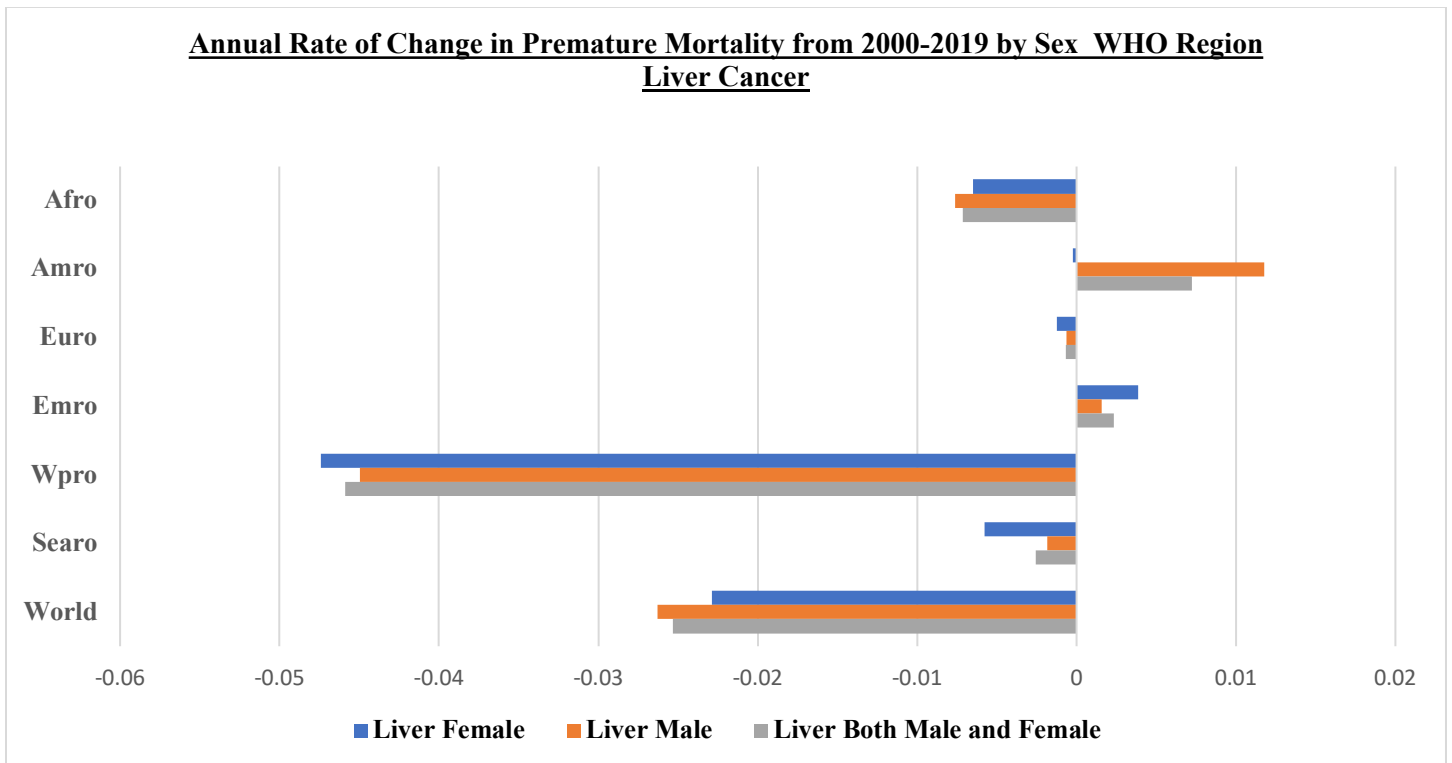

Figure 15: Trends in the annual rate of change in premature mortality from 2000-2019 for liver cancer by sex and world health organization region

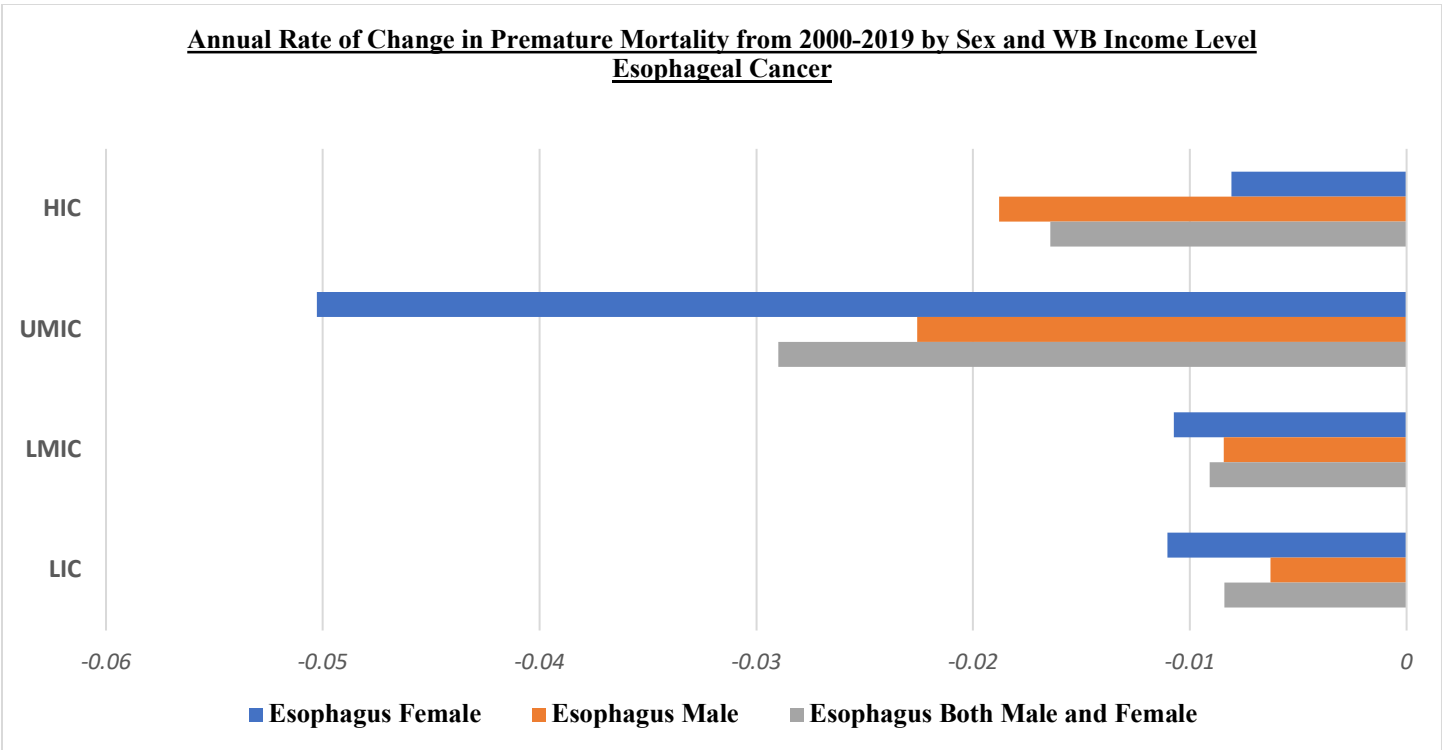

Figure 16: Trends in the annual rate of change in premature mortality from 2000-2019 for esophageal cancer by sex and world bank income level

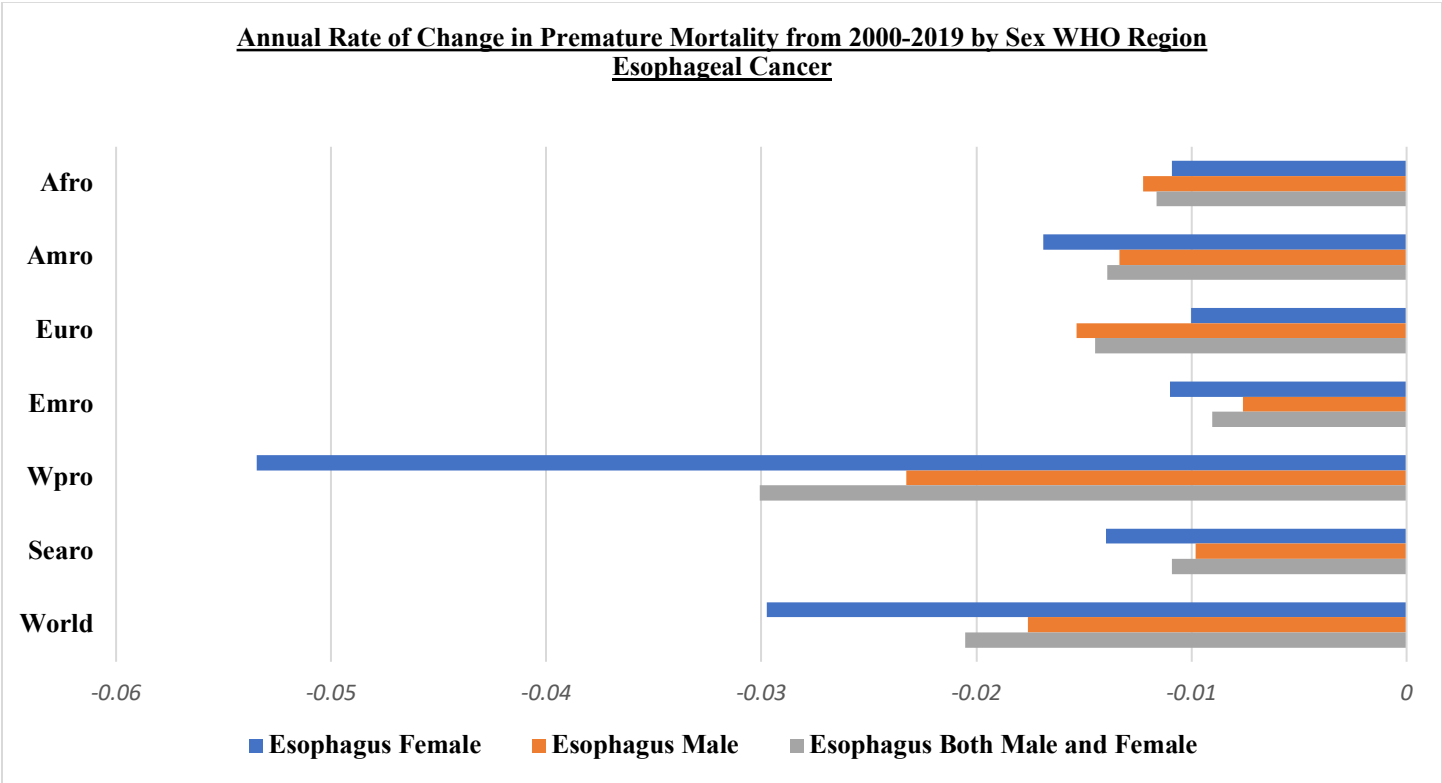

Figure 17: Trends in the annual rate of change in premature mortality from 2000-2019 for esophageal cancer by sex and world health organization region

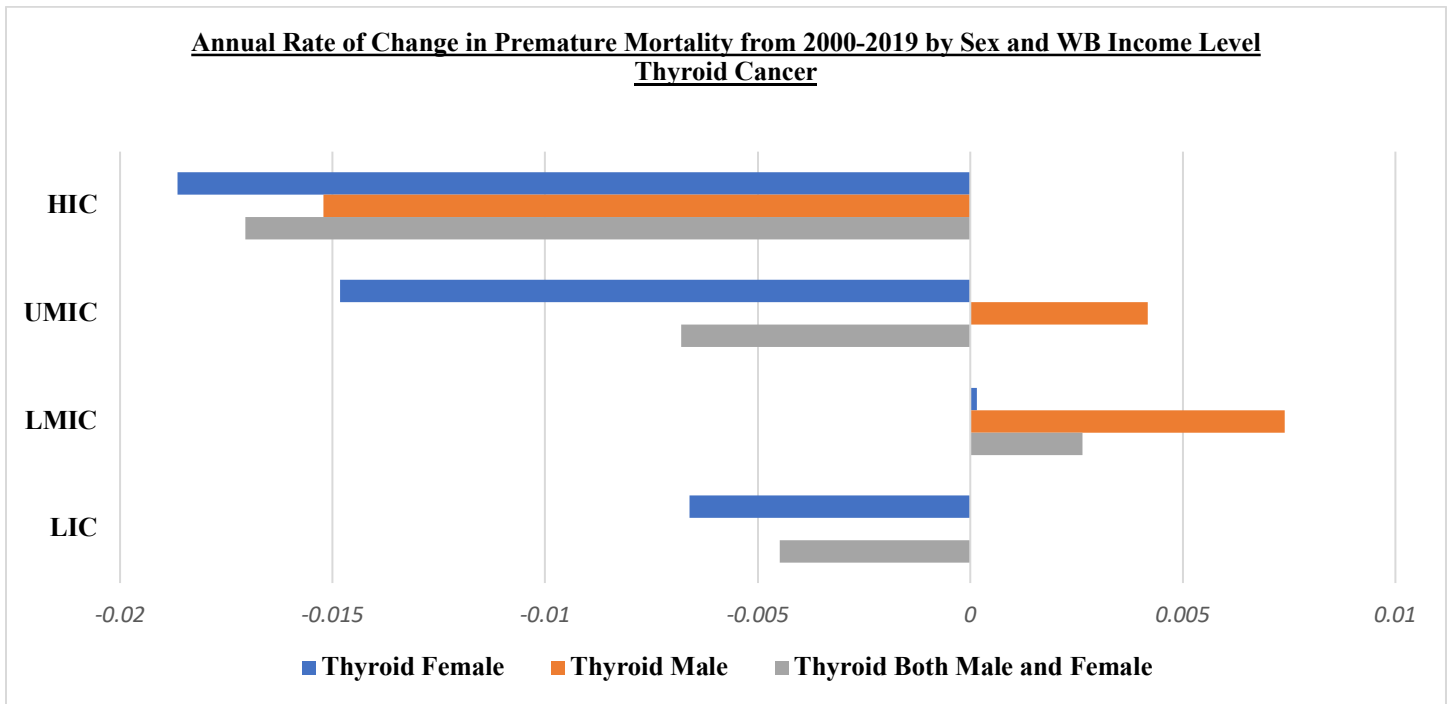

Figure 18: Trends in the annual rate of change in premature mortality from 2000-2019 for thyroid cancer by sex and world bank income level

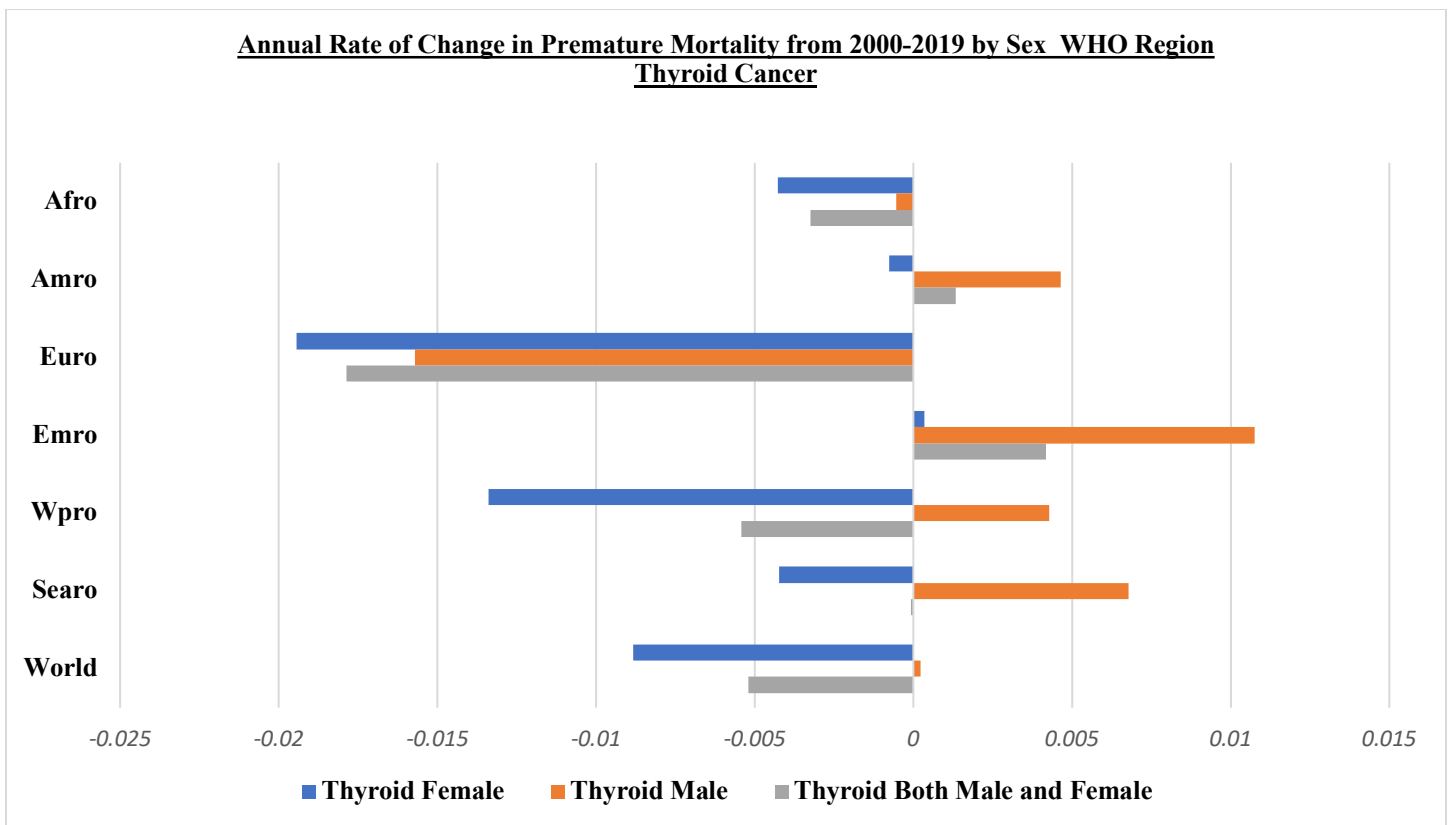

Figure 19: Trends in the annual rate of change in premature mortality from 2000-2019 for thyroid cancer by sex and world health organization

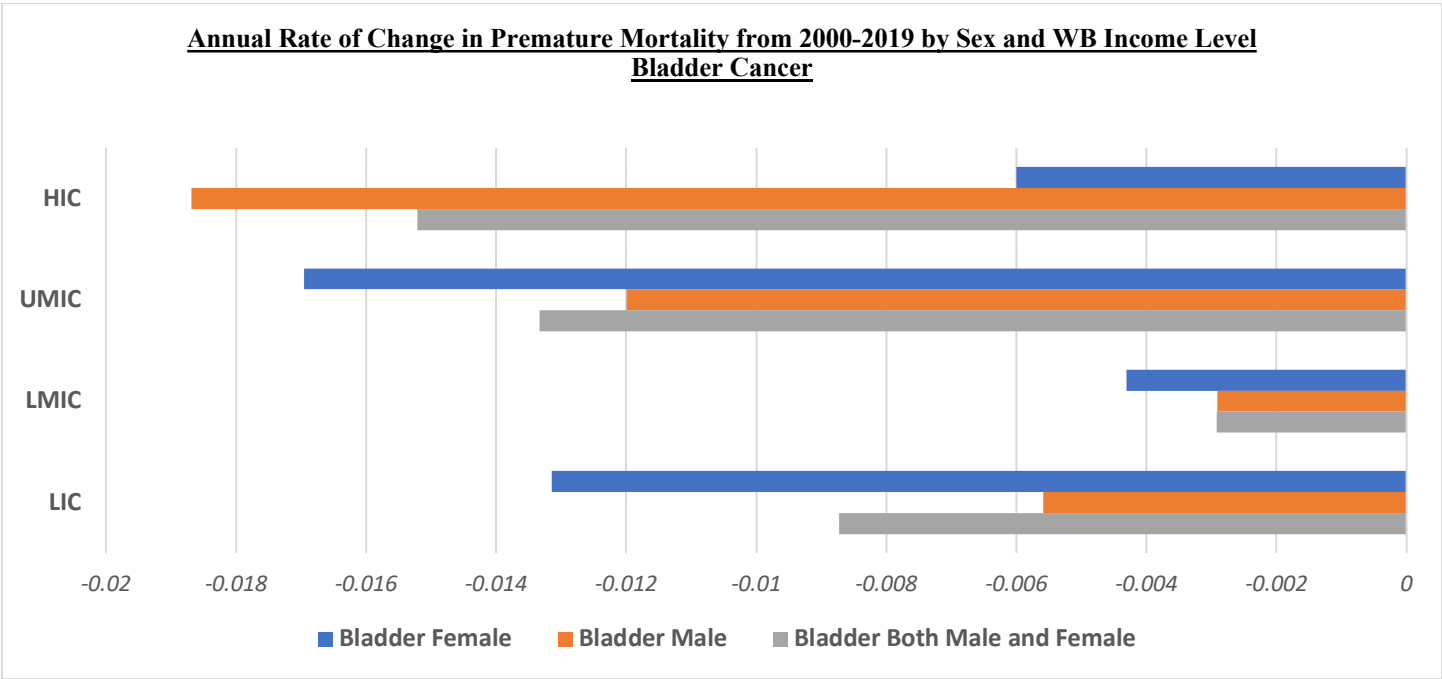

Figure 20: Trends in the annual rate of change in premature mortality from 2000-2019 for bladder cancer by sex and world bank income level

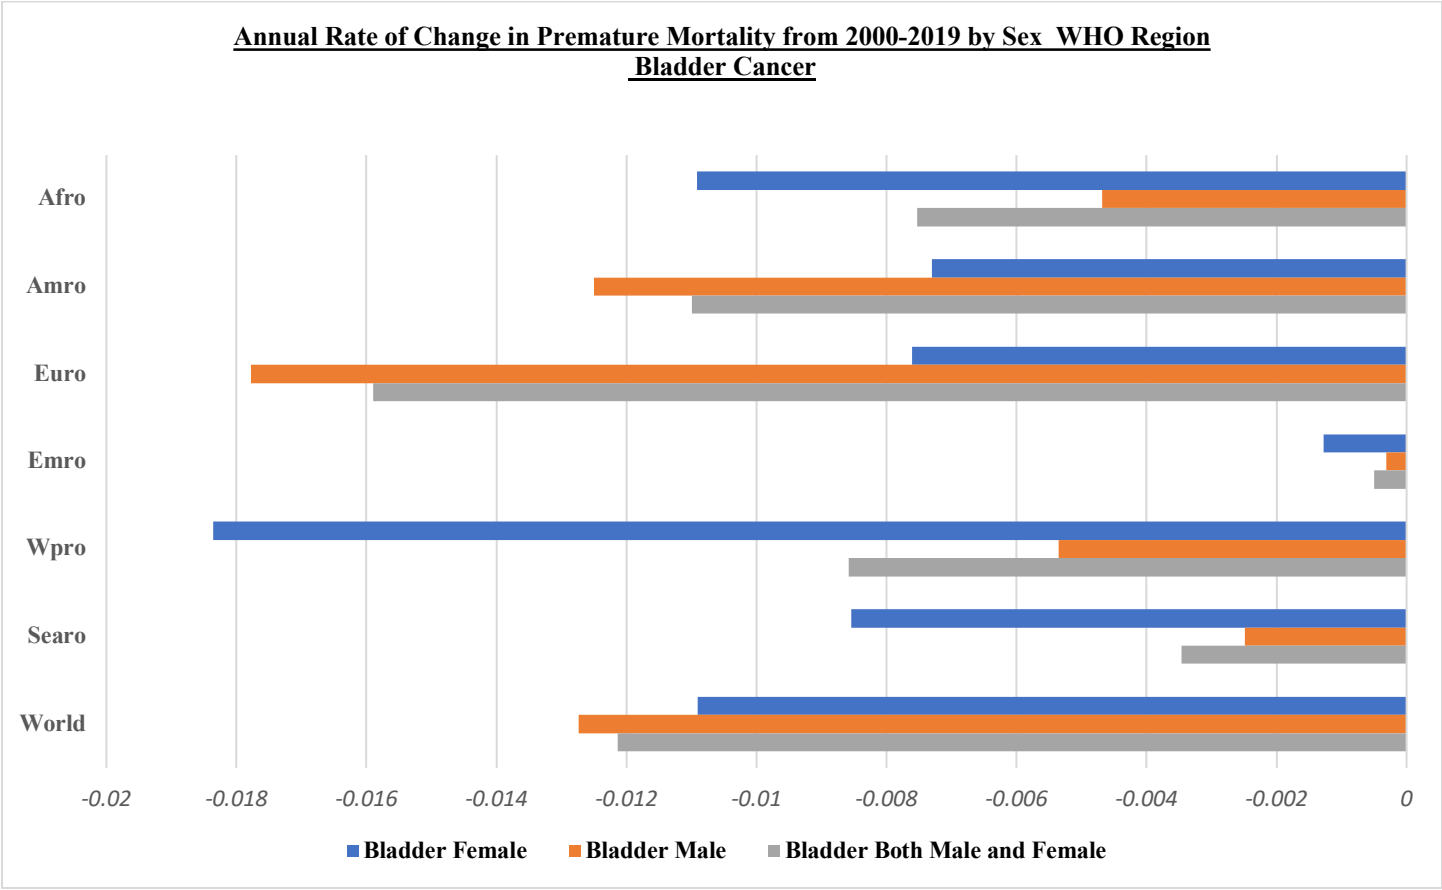

Figure 21: Trends in the annual rate of change in premature mortality from 2000-2019 for bladder cancer by sex and world health organization region

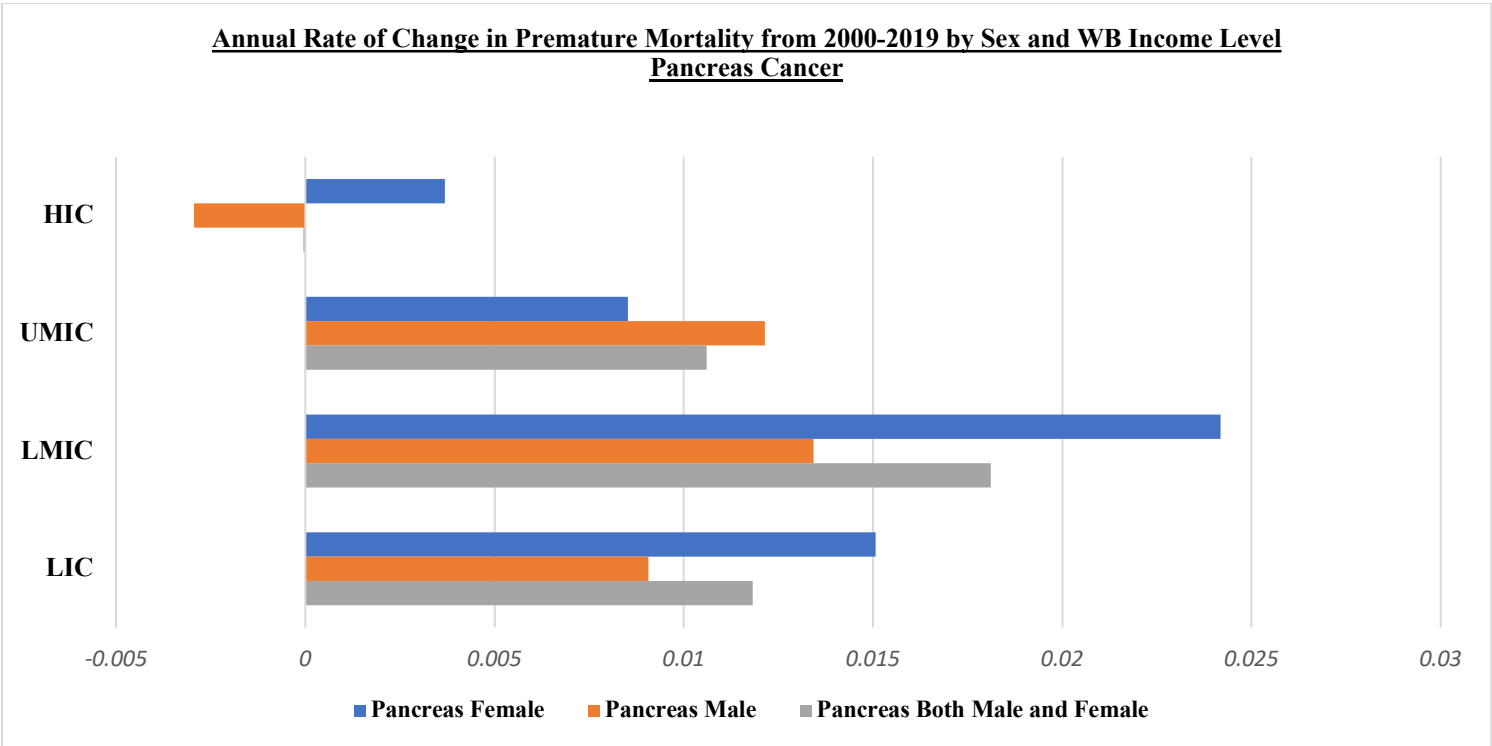

Figure 22: Trends in the annual rate of change in premature mortality from 2000-2019 for pancreas cancer by sex and world bank income level

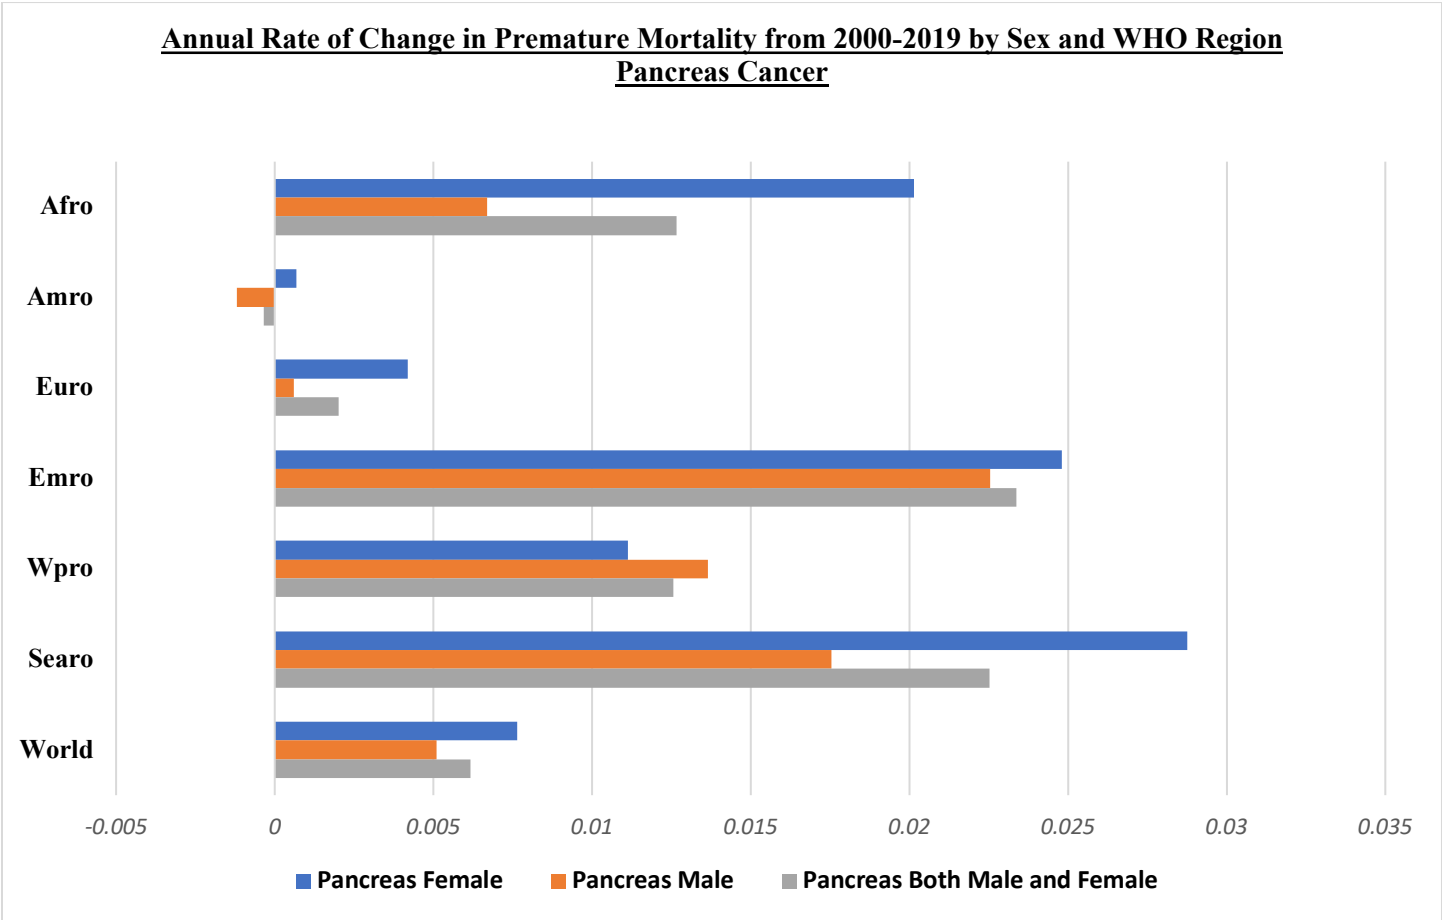

Figure 23: Trends in annual rate of change in premature mortality from 2000-2019 for pancreas cancer by sex and world health organization region

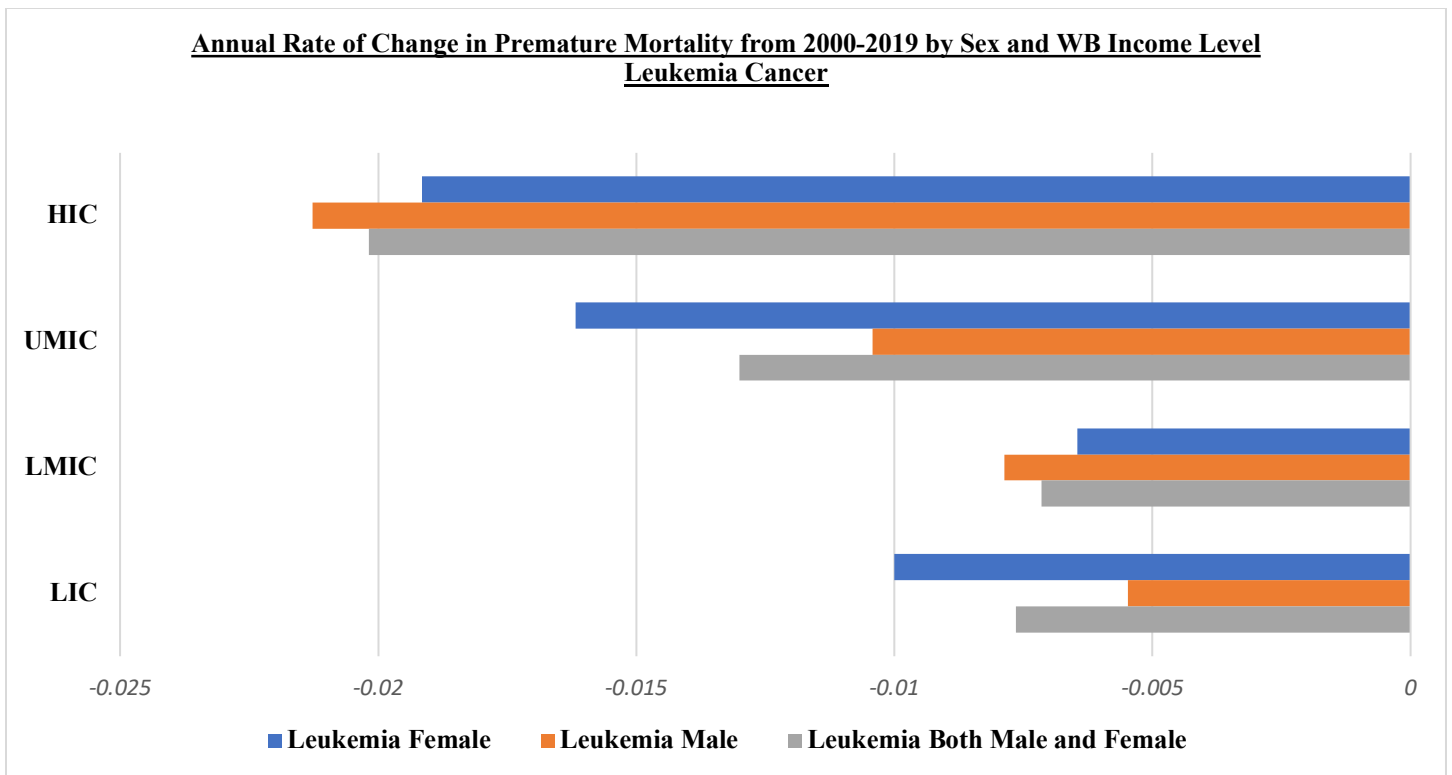

Figure 24: Trends in the annual rate of change in premature mortality from 2000-2019 for leukemia cancer by sex and world bank income level

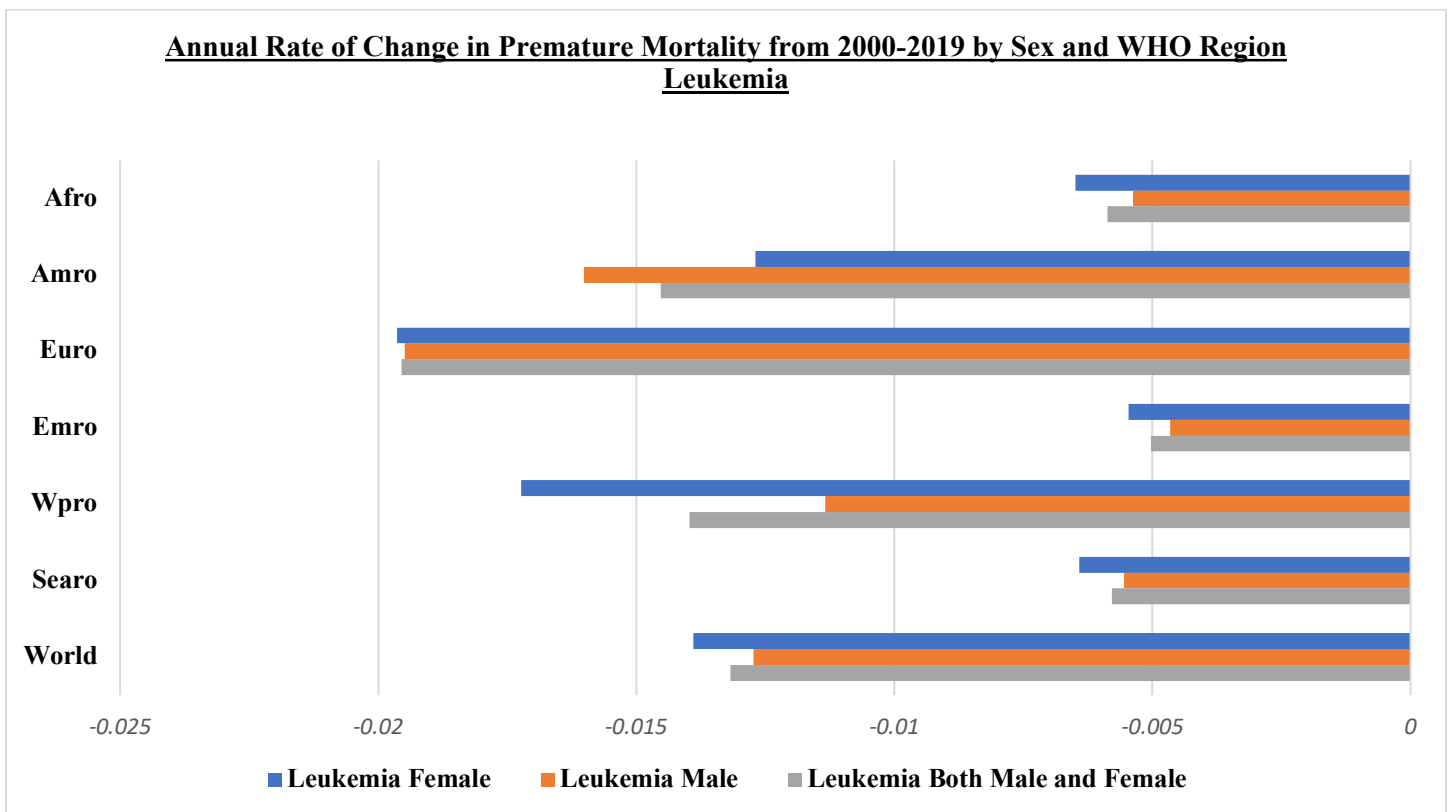

Figure 25: Trends in the annual rate of change in premature mortality from 2000-2019 for leukemia cancer by sex and world health organization region



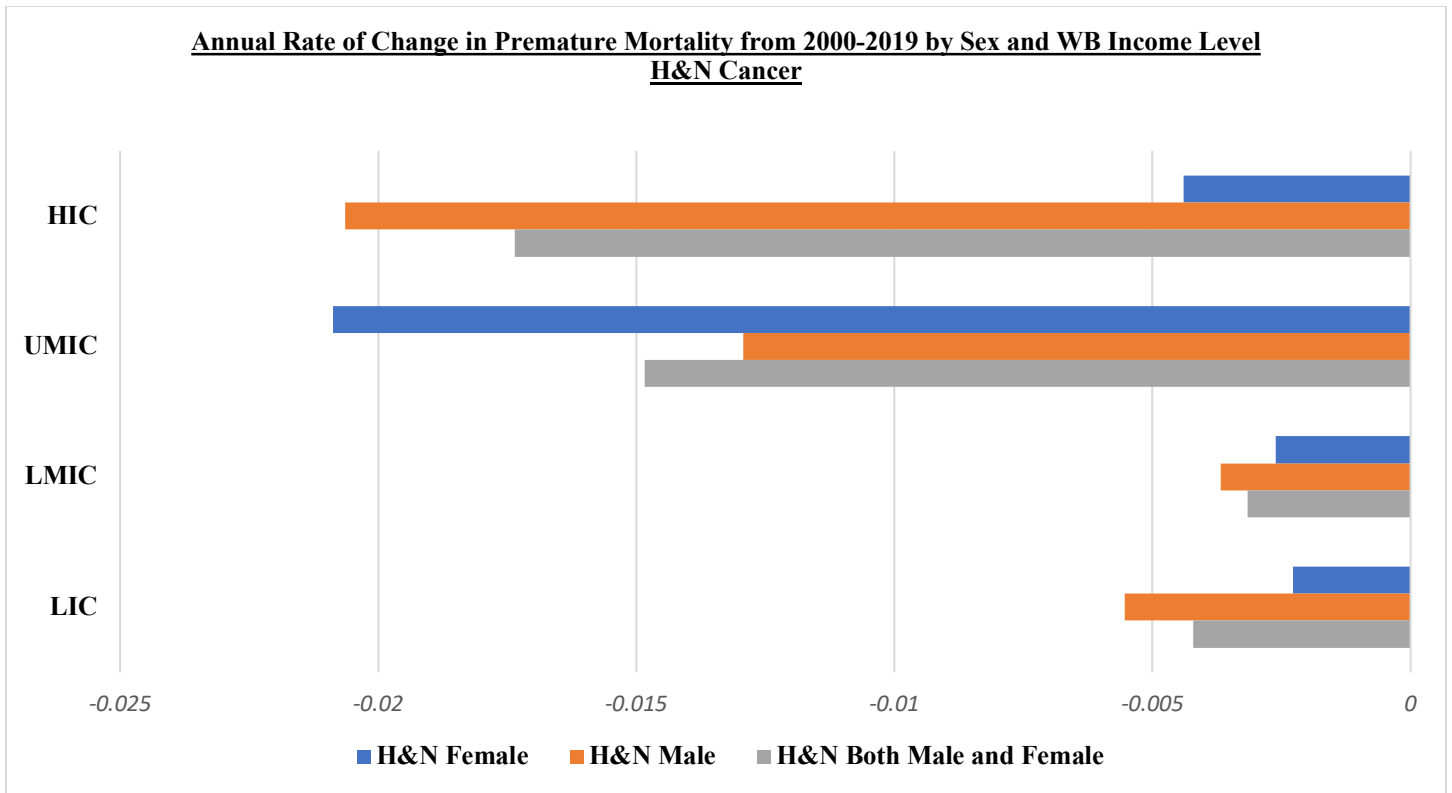

Figure 26: Trends in the annual rate of change in premature mortality from 2000-2019 for head and neck cancer by sex and world bank income level

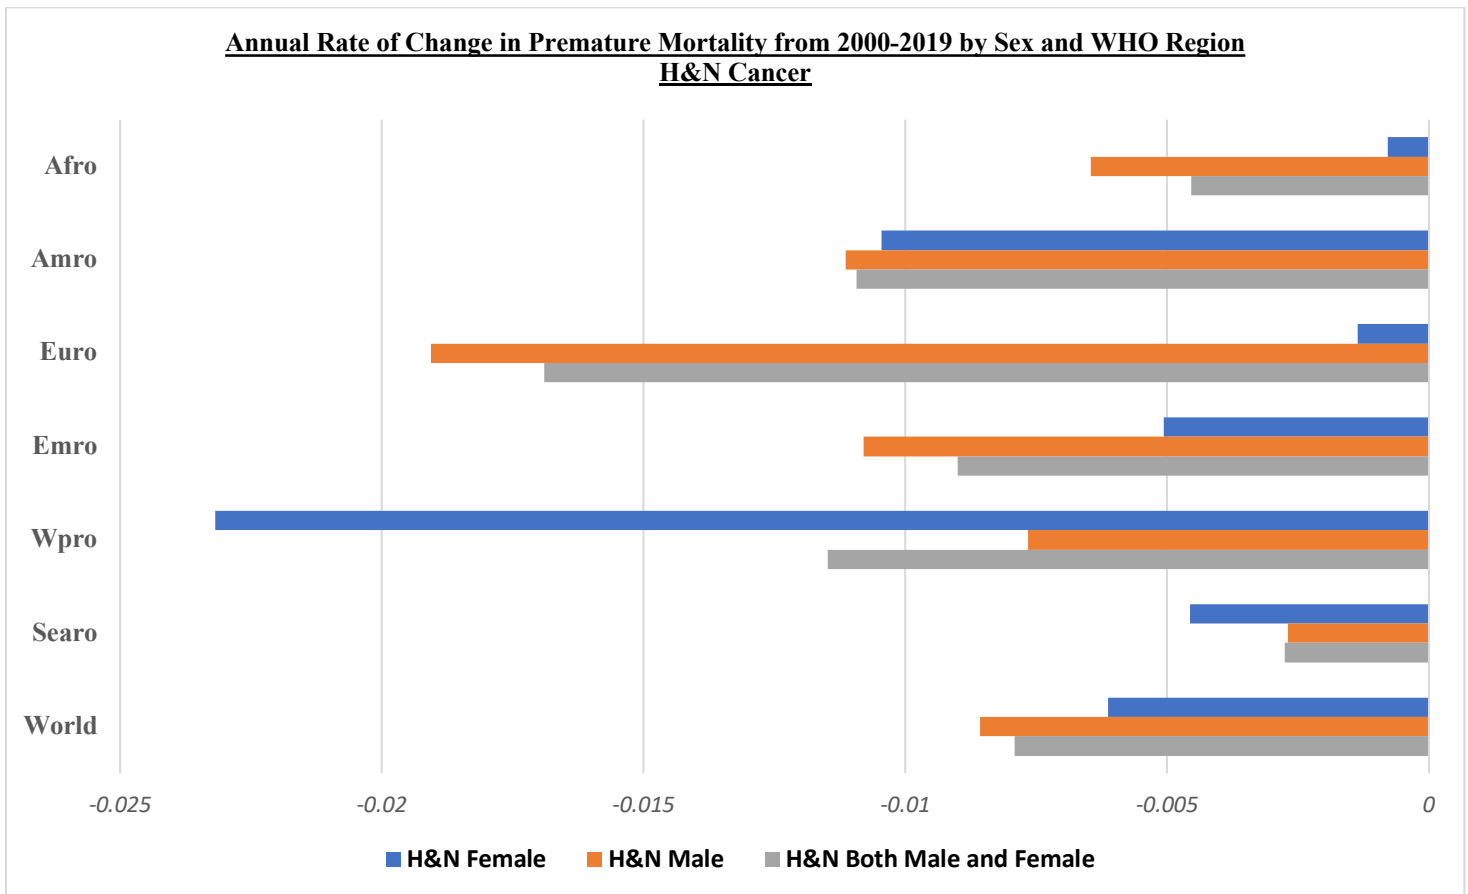

Figure 27: Trends in the annual rate of change in premature mortality from 2000-2019 for head and neck cancer by sex and world health organization region
